# Supplementary material for: Dynamic succession of substrate-associated bacterial composition and function during Ganoderma lucidum growth
Source: PubMed Central journal article supplement (PMC6004108; doi:10.7717/peerj.4975), 2018-06-13

# The Relative abundance

## KEGG Class

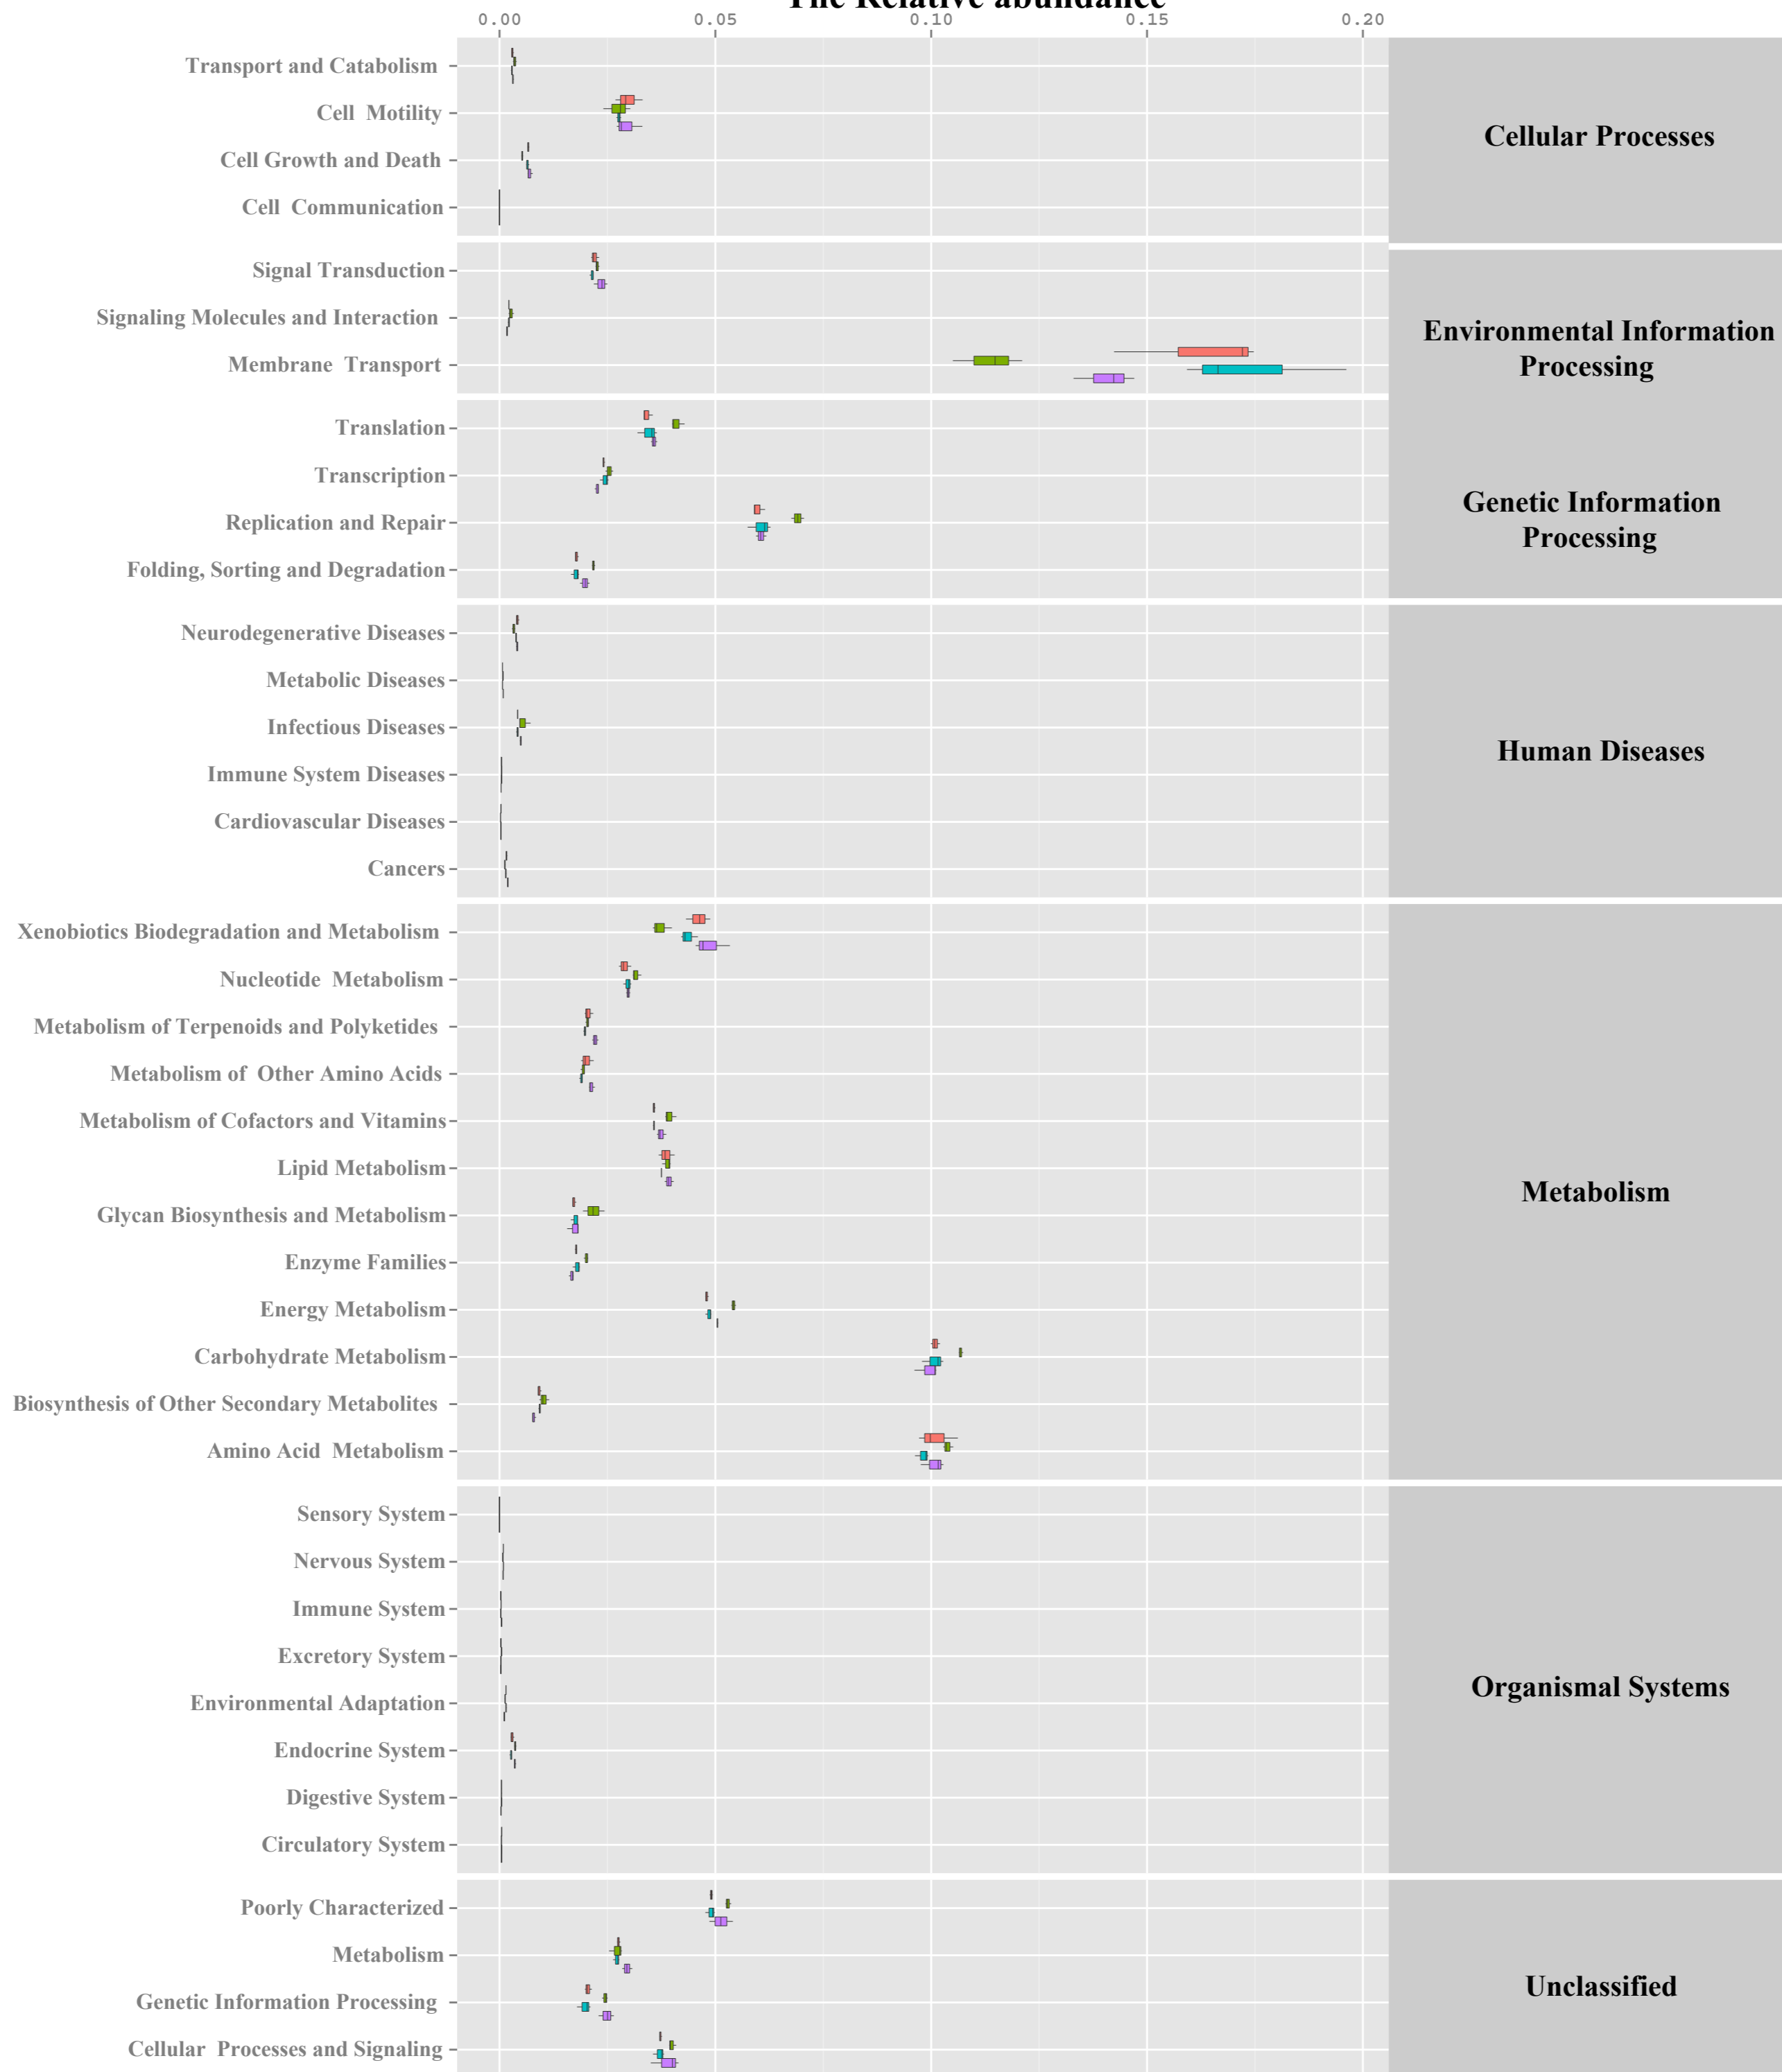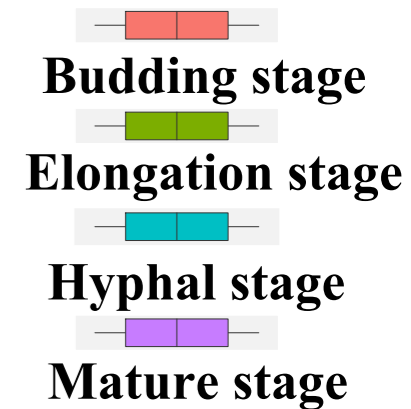

Supplement: peerj-06-4975-s007.pdf [file peerj-06-4975-s007.pdf]
